# Supplementary material
Source: PubMed Central journal article supplement (PMC1356311)
Supplement: 7600871s1.pdf [file 7600871s1.pdf]

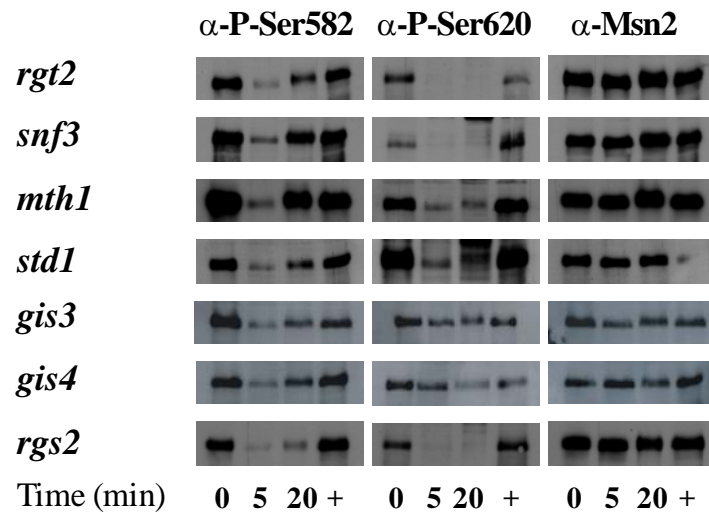

**Fig. S1** Phosphorylation pattern of the Msn2-NLS in glucose-sensing mutants. Western blot analyses were performed with crude protein extracts obtained from mutants (Euroscarf) before (0) and during acute glucose depletion (5, 20) and 20 min after glucose re-addition (+). Endogenous levels of Msn2 were detected with polyclonal  $\alpha$ -Msn2 antibodies. Phosphorylation of Msn2 was monitored with  $\alpha$ -P-S582 and  $\alpha$ -P-S620 antibodies, respectively.
